# Supplementary material for: New sesquiterpene hydroquinones from the Caribbean sponge Aka coralliphagum
Source: PubMed Central journal article supplement (PMC3999825; doi:10.3762/bjoc.10.52), 2014-03-06
Supplement: Beilstein_J_Org_Chem-10-613-s001.pdf [file Beilstein_J_Org_Chem-10-613-s001.pdf]

## Supporting Information

for

### New sesquiterpene hydroquinones from the Caribbean sponge

*Aka coralliphagum*

Qun Göthel and Matthias Köck\*

Address: Alfred-Wegener-Institut, Helmholtz-Zentrum für Polar- und Meeresforschung,  
Am Handelshafen 12, 27570 Bremerhaven, Germany

\* Corresponding author

E-mail: Matthias Köck\* - [mkoeck@awi.de](mailto:mkoeck@awi.de)

### 1D and 2D NMR spectra of the isolated compounds

|                                                                                                                                       |     |
|---------------------------------------------------------------------------------------------------------------------------------------|-----|
| <b>Figure S1:</b> 1D $^1\text{H}$ NMR spectrum of siphonodictyal E1 ( <b>1</b> ) in DMSO- $d_6$ , 303 K, 600 MHz.....                 | S2  |
| <b>Figure S2:</b> 1D $^{13}\text{C}$ NMR spectrum of siphonodictyal E1 ( <b>1</b> ) in DMSO- $d_6$ , 303 K, 150 MHz.....              | S2  |
| <b>Figure S3:</b> 2D $^1\text{H}$ , $^{13}\text{C}$ -HSQC spectrum of siphonodictyal E1 ( <b>1</b> ) in DMSO- $d_6$ , 303 K.....      | S3  |
| <b>Figure S4:</b> 2D $^1\text{H}$ , $^{13}\text{C}$ -HMBC spectrum of siphonodictyal E1 ( <b>1</b> ) in DMSO- $d_6$ , 303 K.....      | S3  |
| <b>Figure S5:</b> 2D $^1\text{H}$ , $^1\text{H}$ -COSY spectrum of siphonodictyal E1 ( <b>1</b> ) in DMSO- $d_6$ , 303 K.....         | S4  |
| <b>Figure S6:</b> 1D $^1\text{H}$ NMR spectrum of siphonodictyal E2 ( <b>2</b> ) in DMSO- $d_6$ , 303 K, 600 MHz.....                 | S5  |
| <b>Figure S7:</b> 1D $^{13}\text{C}$ NMR spectrum of siphonodictyal E2 ( <b>2</b> ) in DMSO- $d_6$ , 303 K, 150 MHz.....              | S5  |
| <b>Figure S8:</b> 2D $^1\text{H}$ , $^{13}\text{C}$ -HSQC spectrum of siphonodictyal E2 ( <b>2</b> ) in DMSO- $d_6$ , 303 K.....      | S6  |
| <b>Figure S9:</b> 2D $^1\text{H}$ , $^{13}\text{C}$ -HMBC spectrum of siphonodictyal E2 ( <b>2</b> ) in DMSO- $d_6$ , 303 K.....      | S6  |
| <b>Figure S10:</b> 2D $^1\text{H}$ , $^1\text{H}$ -COSY spectrum of siphonodictyal E2 ( <b>2</b> ) in DMSO- $d_6$ , 303 K.....        | S7  |
| <b>Figure S11:</b> 1D $^1\text{H}$ NMR spectrum of siphonodictyal E3 ( <b>3</b> ) in DMSO- $d_6$ , 303 K, 600 MHz .....               | S8  |
| <b>Figure S12:</b> 1D $^{13}\text{C}$ NMR spectrum of siphonodictyal E3 ( <b>3</b> ) in DMSO- $d_6$ , 303 K, 150 MHz .....            | S8  |
| <b>Figure S13:</b> 2D $^1\text{H}$ , $^{13}\text{C}$ -HSQC spectrum of siphonodictyal E3 ( <b>3</b> ) in DMSO- $d_6$ , 303 K .....    | S9  |
| <b>Figure S14:</b> 2D $^1\text{H}$ , $^{13}\text{C}$ -HMBC spectrum of siphonodictyal E3 ( <b>3</b> ) in DMSO- $d_6$ , 303 K .....    | S9  |
| <b>Figure S15:</b> 2D $^1\text{H}$ , $^1\text{H}$ -COSY spectrum of siphonodictyal E3 ( <b>3</b> ) in DMSO- $d_6$ , 303 K.....        | S10 |
| <b>Figure S16:</b> 1D $^1\text{H}$ NMR spectrum of siphonodictyal E4 ( <b>4</b> ) in DMSO- $d_6$ , 303 K, 600 MHz .....               | S11 |
| <b>Figure S17:</b> 1D $^{13}\text{C}$ NMR spectrum of siphonodictyal E4 ( <b>4</b> ) in DMSO- $d_6$ , 303 K, 150 MHz .....            | S11 |
| <b>Figure S18:</b> 2D $^1\text{H}$ , $^{13}\text{C}$ -HSQC spectrum of siphonodictyal E4 ( <b>4</b> ) in DMSO- $d_6$ , 303 K .....    | S12 |
| <b>Figure S19:</b> 2D $^1\text{H}$ , $^{13}\text{C}$ -HMBC spectrum of siphonodictyal E4 ( <b>4</b> ) in DMSO- $d_6$ , 303 K .....    | S12 |
| <b>Figure S20:</b> 2D $^1\text{H}$ , $^1\text{H}$ -COSY spectrum of siphonodictyal E4 ( <b>4</b> ) in DMSO- $d_6$ , 303 K.....        | S13 |
| <b>Figure S21:</b> 1D $^1\text{H}$ NMR spectrum of cyclosiphonodictyol A ( <b>5</b> ) in DMSO- $d_6$ , 303 K, 600 MHz .....           | S14 |
| <b>Figure S22:</b> 1D $^{13}\text{C}$ NMR spectrum of cyclosiphonodictyol A ( <b>5</b> ) in DMSO- $d_6$ , 303 K, 150 MHz .....        | S14 |
| <b>Figure S23:</b> 2D $^1\text{H}$ , $^{13}\text{C}$ -HSQC spectrum of cyclosiphonodictyol A ( <b>5</b> ) in DMSO- $d_6$ , 303 K..... | S15 |
| <b>Figure S24:</b> 2D $^1\text{H}$ , $^{13}\text{C}$ -HMBC spectrum of cyclosiphonodictyol A ( <b>5</b> ) in DMSO- $d_6$ , 303 K..... | S15 |
| <b>Figure S25:</b> 2D $^1\text{H}$ , $^1\text{H}$ -COSY spectrum of cyclosiphonodictyol A ( <b>5</b> ) in DMSO- $d_6$ , 303 K .....   | S16 |

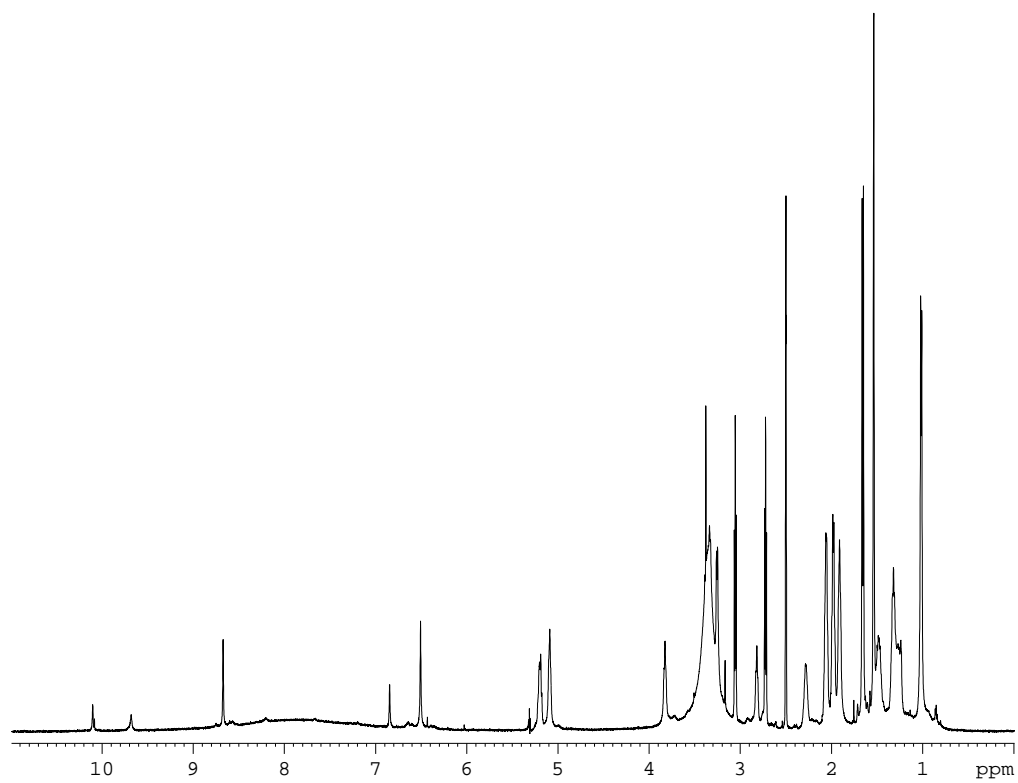

**Figure S1:** 1D <sup>1</sup>H NMR spectrum of siphonodictyal E1 (**1**) in DMSO-*d*<sub>6</sub>, 303 K, 600 MHz.

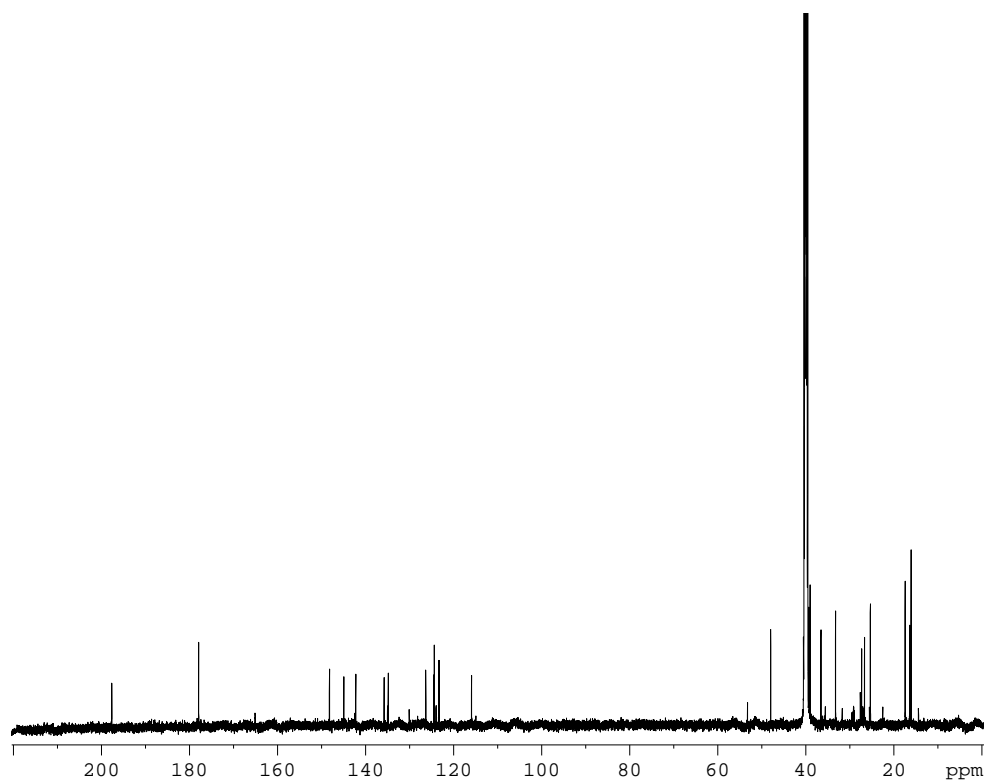

**Figure S2:** 1D <sup>13</sup>C NMR spectrum of siphonodictyal E1 (**1**) in DMSO-*d*<sub>6</sub>, 303 K, 150 MHz.

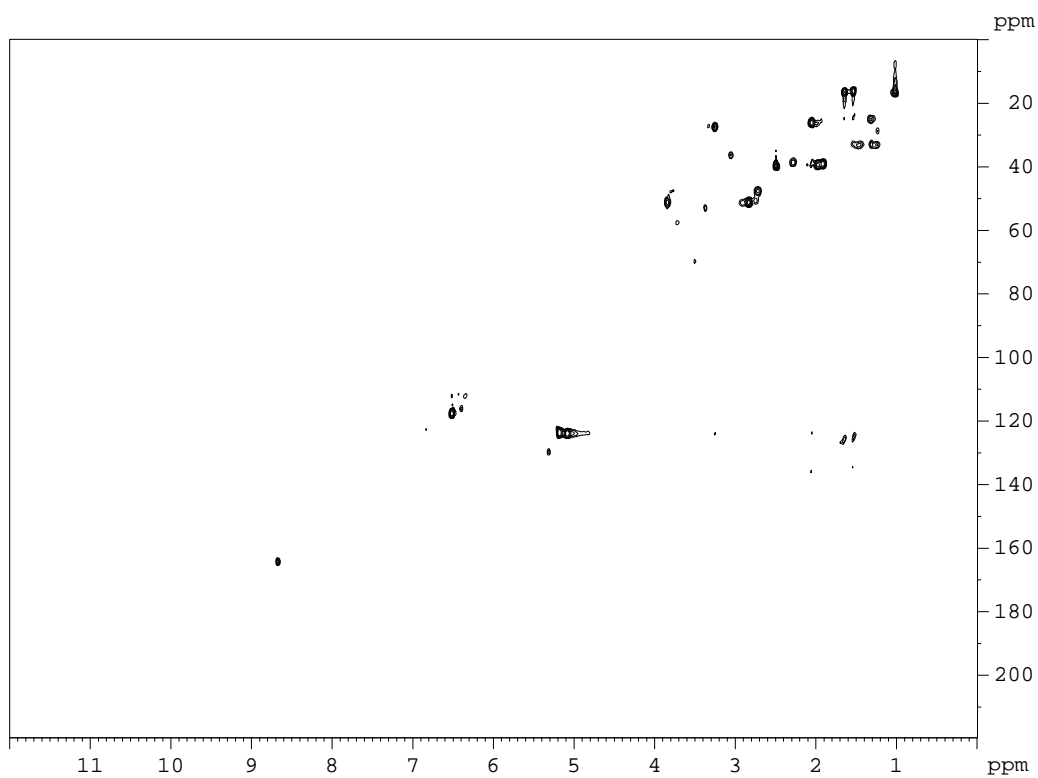

**Figure S3:** 2D  $^1\text{H}$ ,  $^{13}\text{C}$ -HSQC spectrum of siphonodictyal E1 (**1**) in  $\text{DMSO-}d_6$ , 303 K.

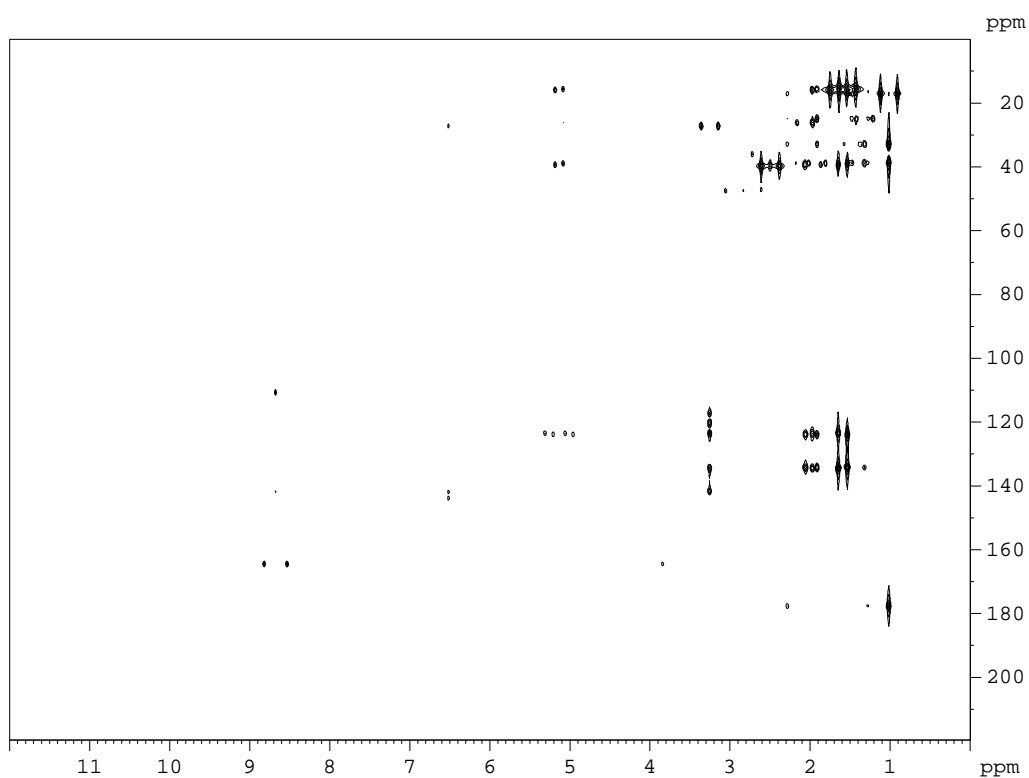

**Figure S4:** 2D  $^1\text{H}$ ,  $^{13}\text{C}$ -HMBC spectrum of siphonodictyal E1 (**1**) in  $\text{DMSO-}d_6$ , 303 K.

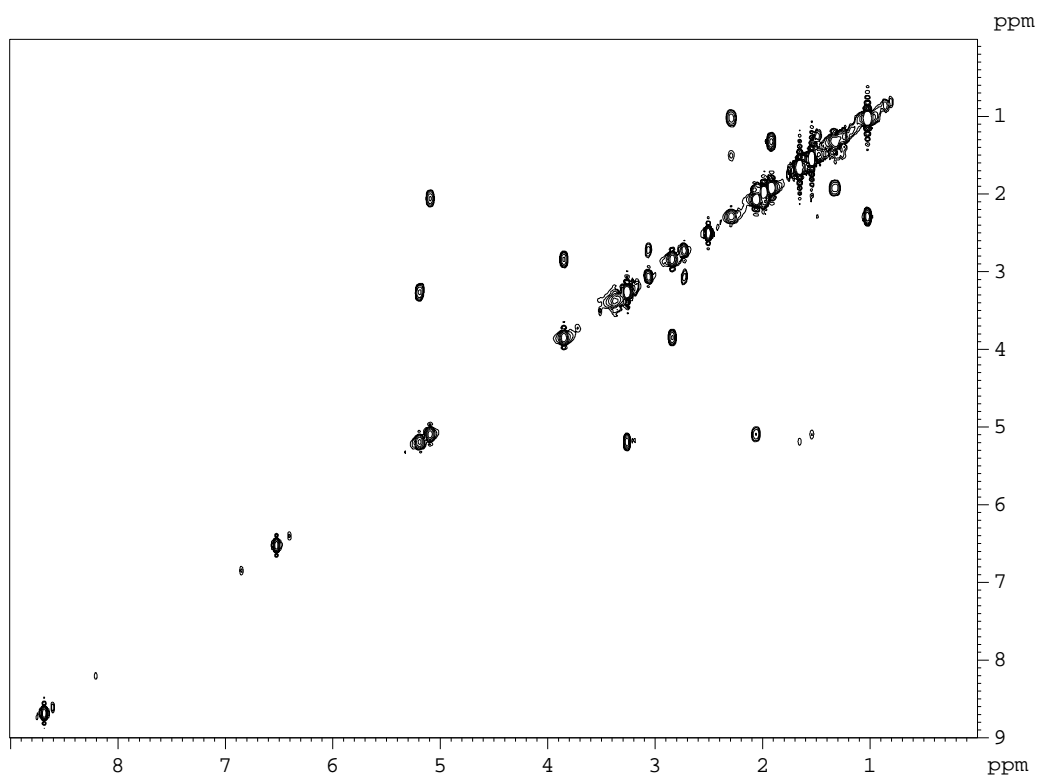

**Figure S5:** 2D  $^1\text{H}$ ,  $^1\text{H}$ -COSY spectrum of siphonodictyal E1 (**1**) in  $\text{DMSO-}d_6$ , 303 K.

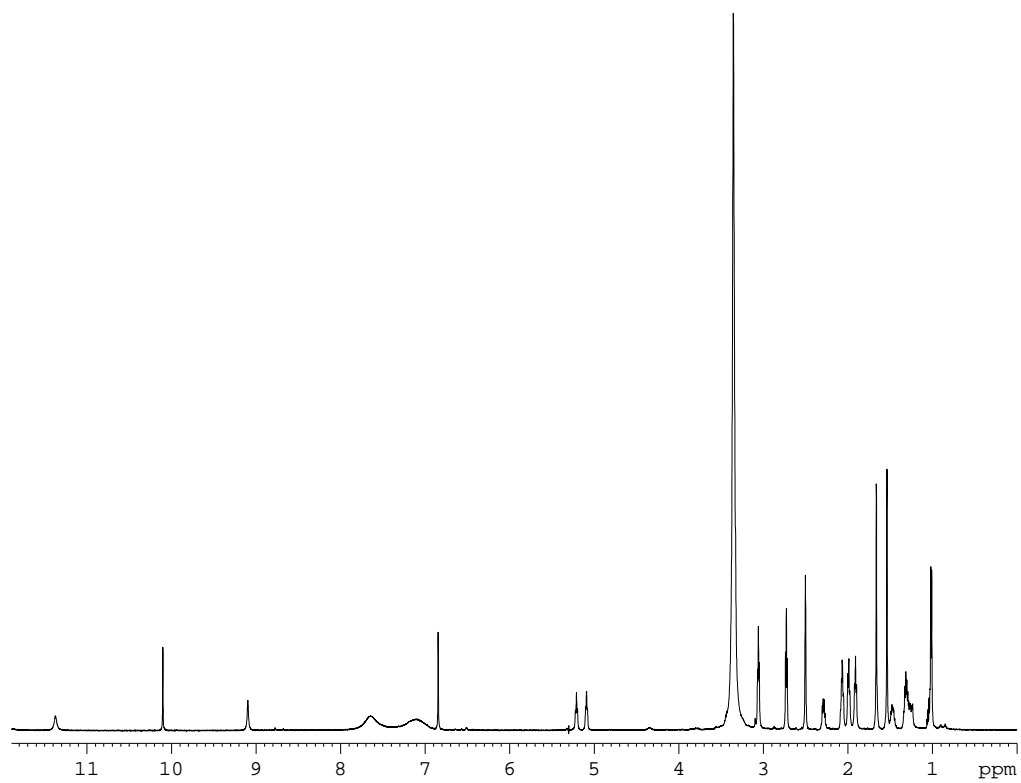

**Figure S6:** 1D <sup>1</sup>H NMR spectrum of siphonodictyal E2 (**2**) in DMSO-*d*<sub>6</sub>, 303 K, 600 MHz.

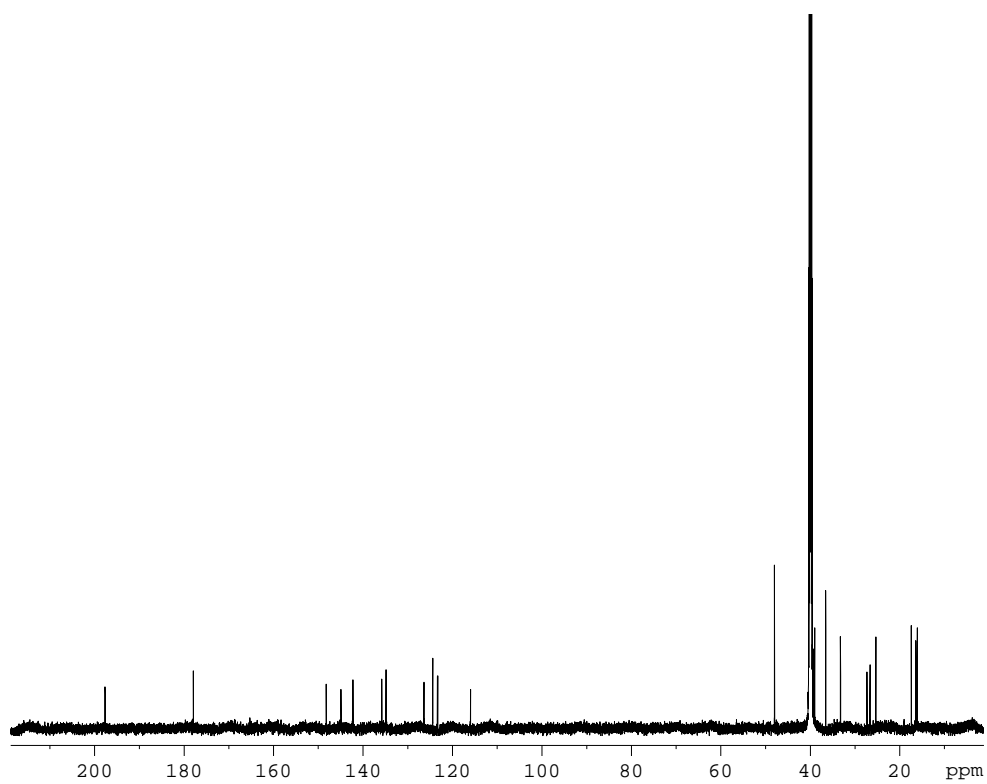

**Figure S7:** 1D <sup>13</sup>C NMR spectrum of siphonodictyal E2 (**2**) in DMSO-*d*<sub>6</sub>, 303 K, 150 MHz.

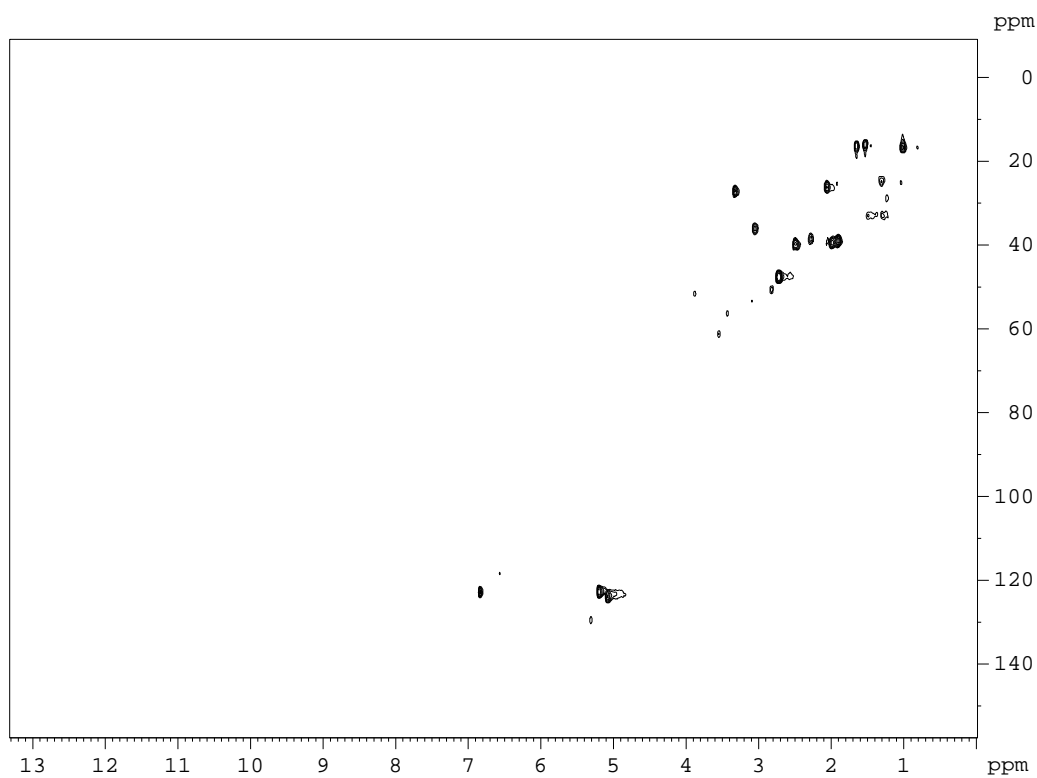

**Figure S8:** 2D  $^1\text{H}$ ,  $^{13}\text{C}$ -HSQC spectrum of siphonodictyal E2 (**2**) in  $\text{DMSO-}d_6$ , 303 K.

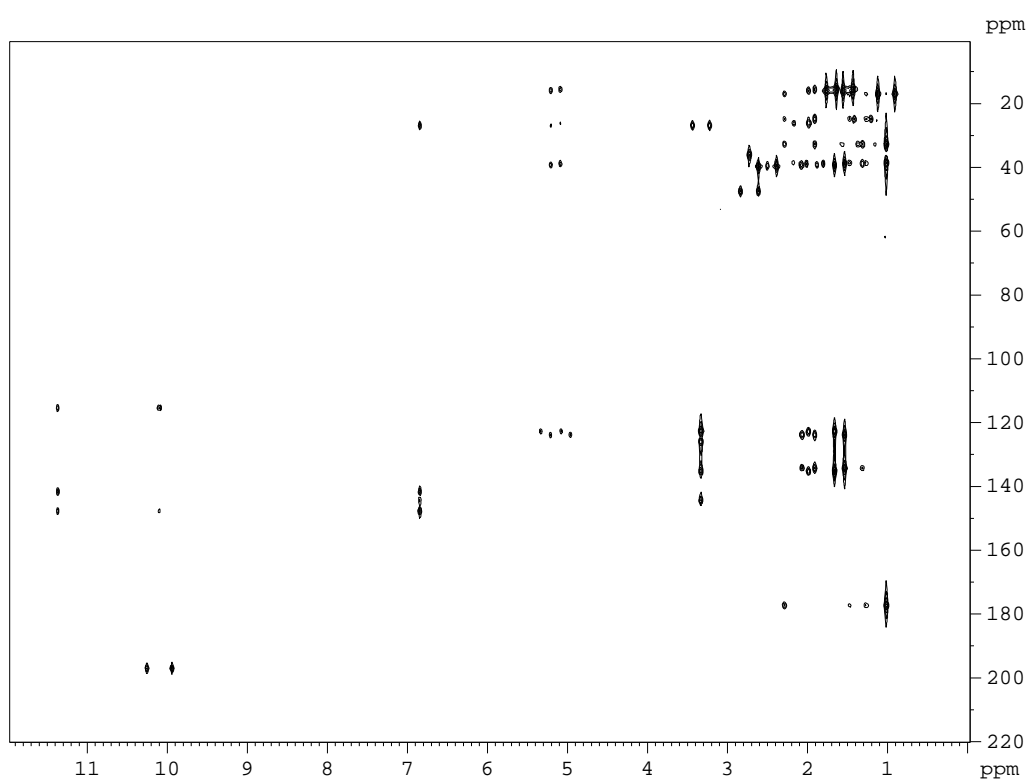

**Figure S9:** 2D  $^1\text{H}$ ,  $^{13}\text{C}$ -HMBC spectrum of siphonodictyal E2 (**2**) in  $\text{DMSO-}d_6$ , 303 K.

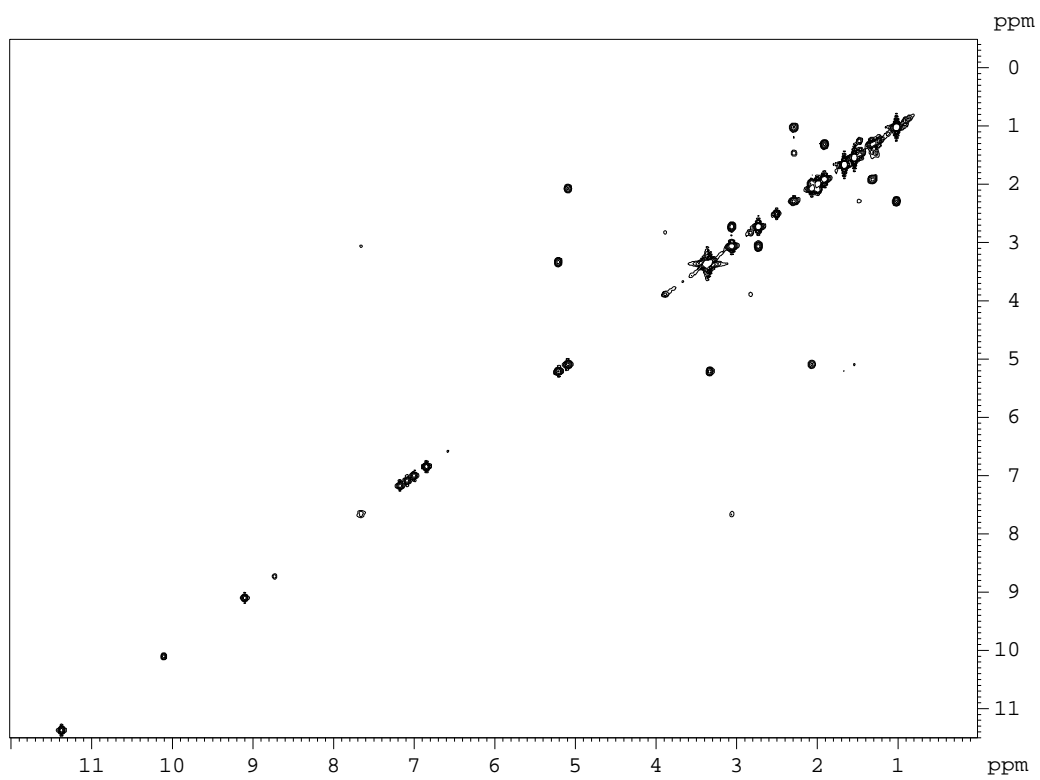

**Figure S10:** 2D  $^1\text{H}$ ,  $^1\text{H}$ -COSY spectrum of siphonodictyal E2 (**2**) in  $\text{DMSO-}d_6$ , 303 K.

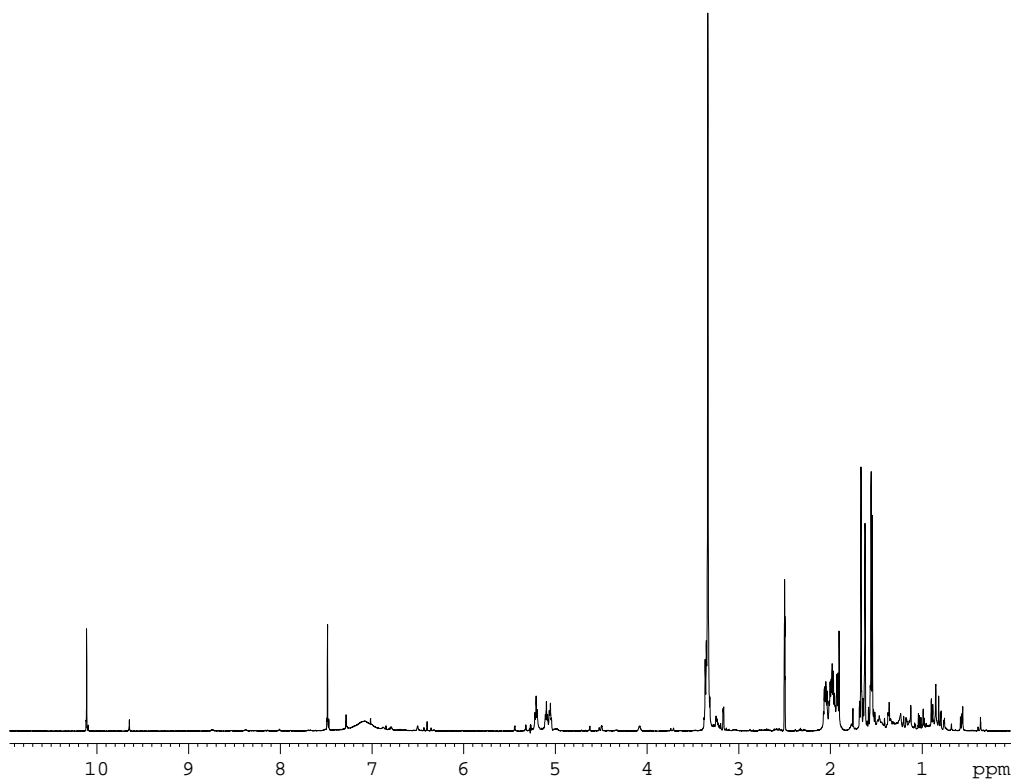

**Figure S11:** 1D <sup>1</sup>H NMR spectrum of siphonodictyal E3 (**3**) in DMSO-*d*<sub>6</sub>, 303 K, 600 MHz.

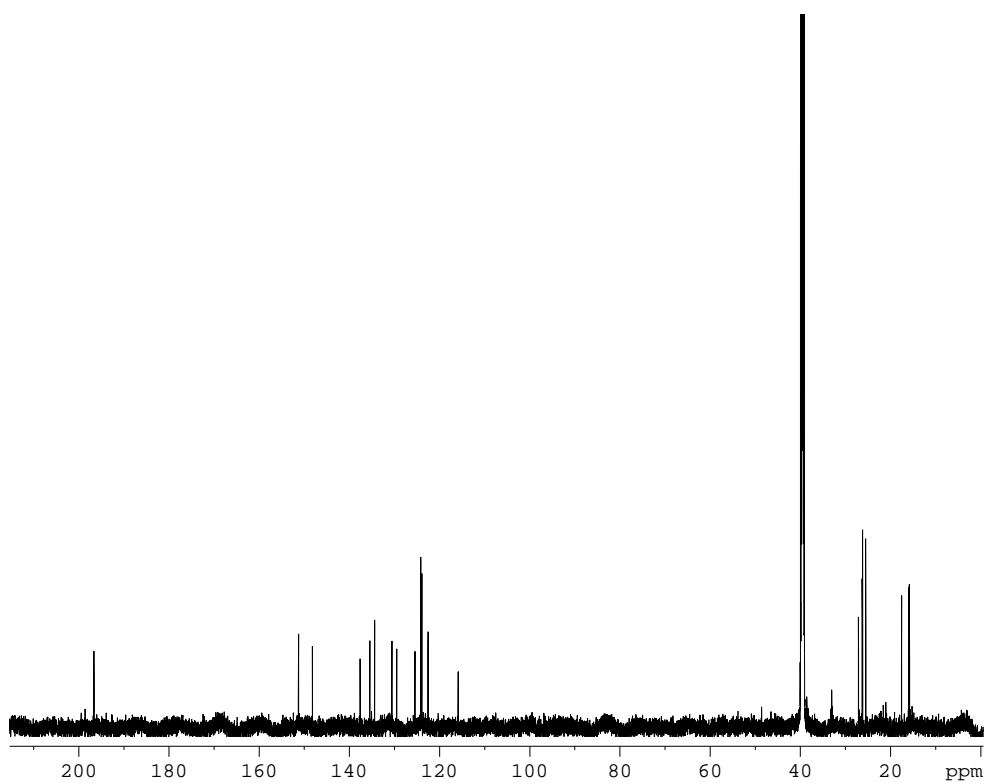

**Figure S12:** 1D <sup>13</sup>C NMR spectrum of siphonodictyal E3 (**3**) in DMSO-*d*<sub>6</sub>, 303 K, 150 MHz.



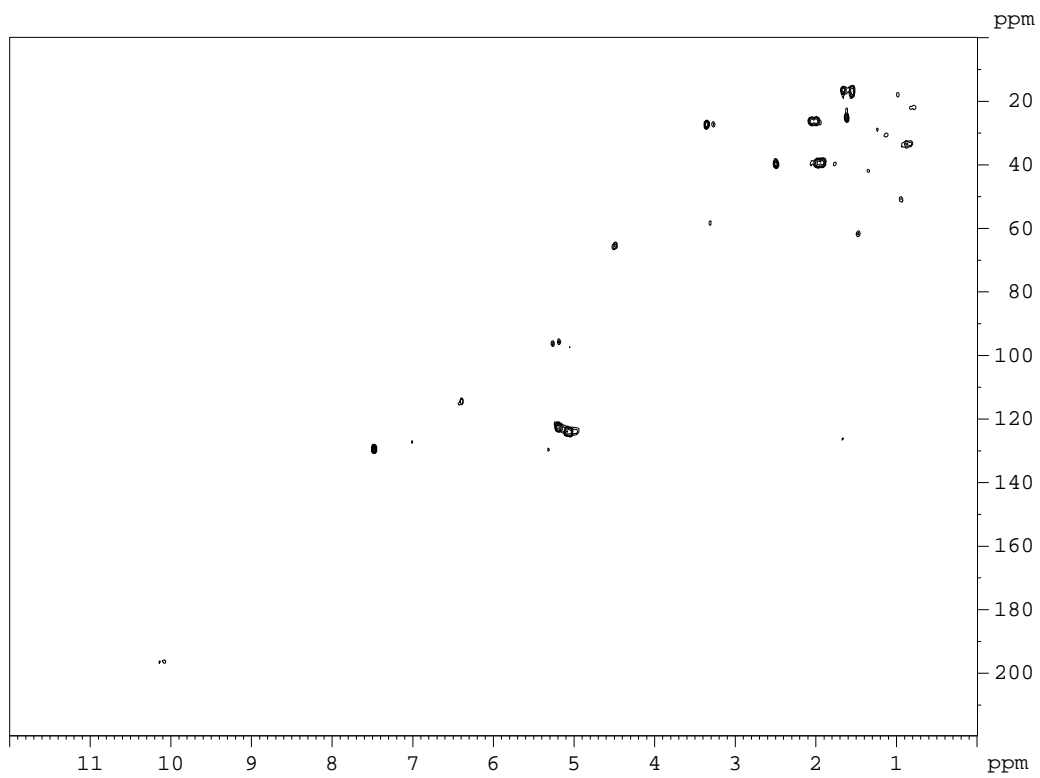

**Figure S13:** 2D  $^1\text{H}$ ,  $^{13}\text{C}$ -HSQC spectrum of siphonodictyal E3 (**3**) in  $\text{DMSO-}d_6$ , 303 K.

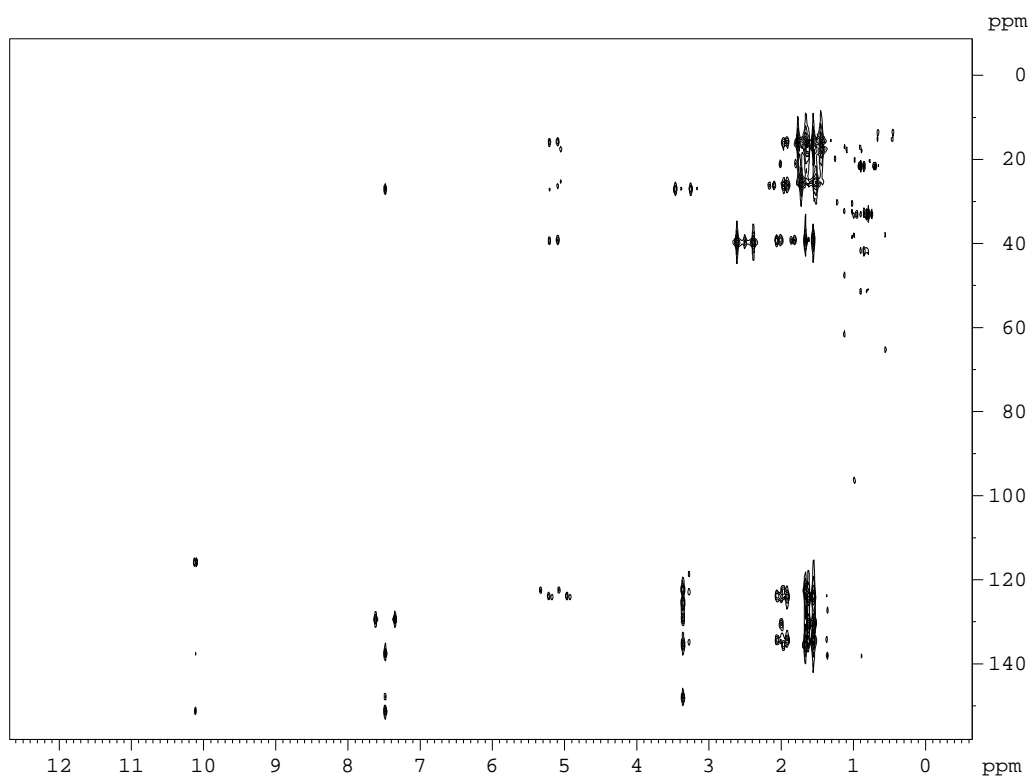

**Figure S14:** 2D  $^1\text{H}$ ,  $^{13}\text{C}$ -HMBC spectrum of siphonodictyal E3 (**3**) in  $\text{DMSO-}d_6$ , 303 K.

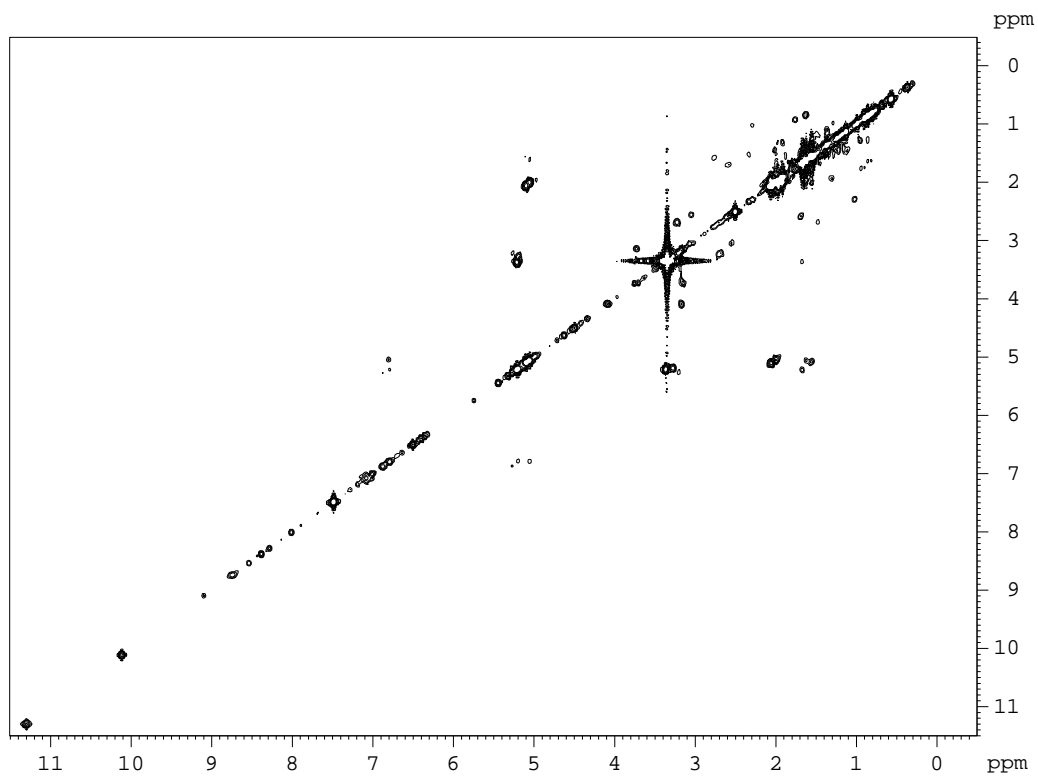

**Figure S15:** 2D  $^1\text{H}$ ,  $^1\text{H}$ -COSY spectrum of siphonodictyal E3 (**3**) in  $\text{DMSO-}d_6$ , 303 K.

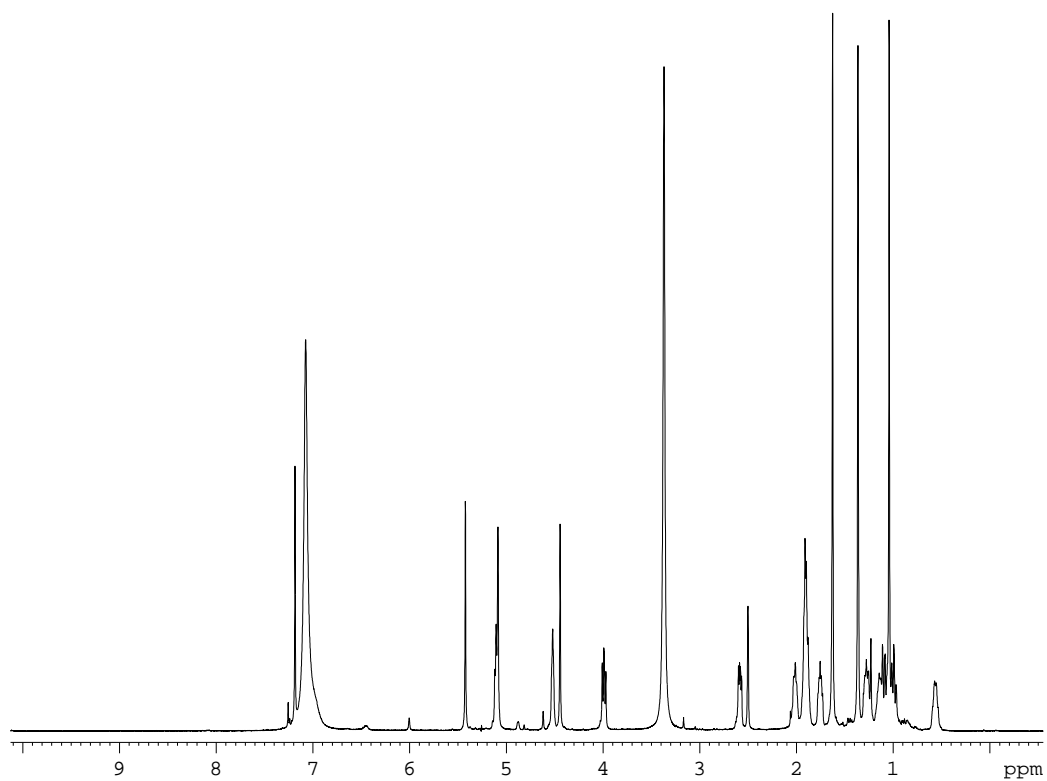

**Figure S16:** 1D <sup>1</sup>H NMR spectrum of siphonodictyal E4 (**4**) in DMSO-*d*<sub>6</sub>, 303 K, 600 MHz.

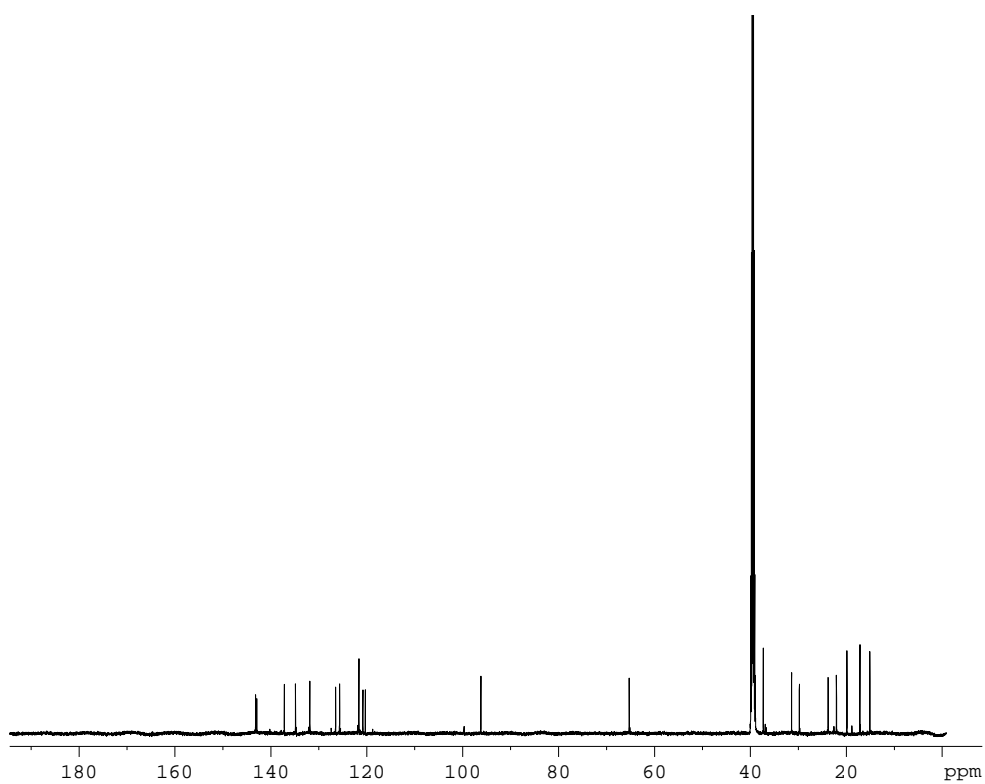

**Figure S17:** 1D <sup>13</sup>C NMR spectrum of siphonodictyal E4 (**4**) in DMSO-*d*<sub>6</sub>, 303 K, 150 MHz.

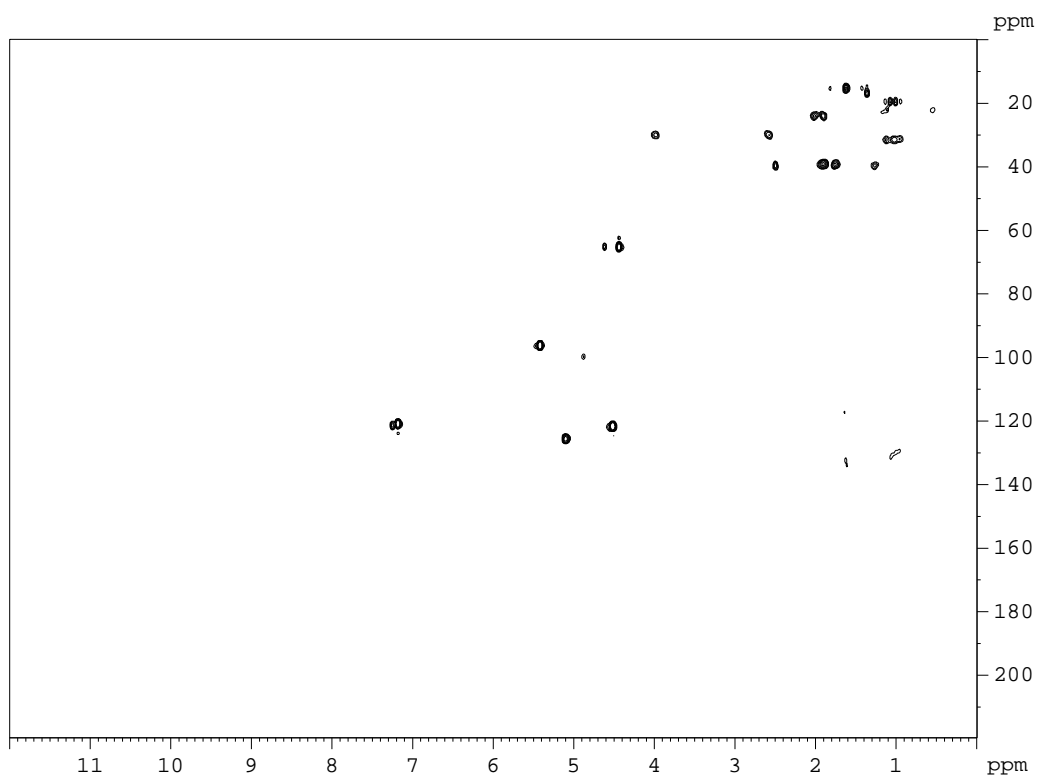

**Figure S18:** 2D  $^1\text{H}$ ,  $^{13}\text{C}$ -HSQC spectrum of siphonodictyal E4 (**4**) in  $\text{DMSO-}d_6$ , 303 K.

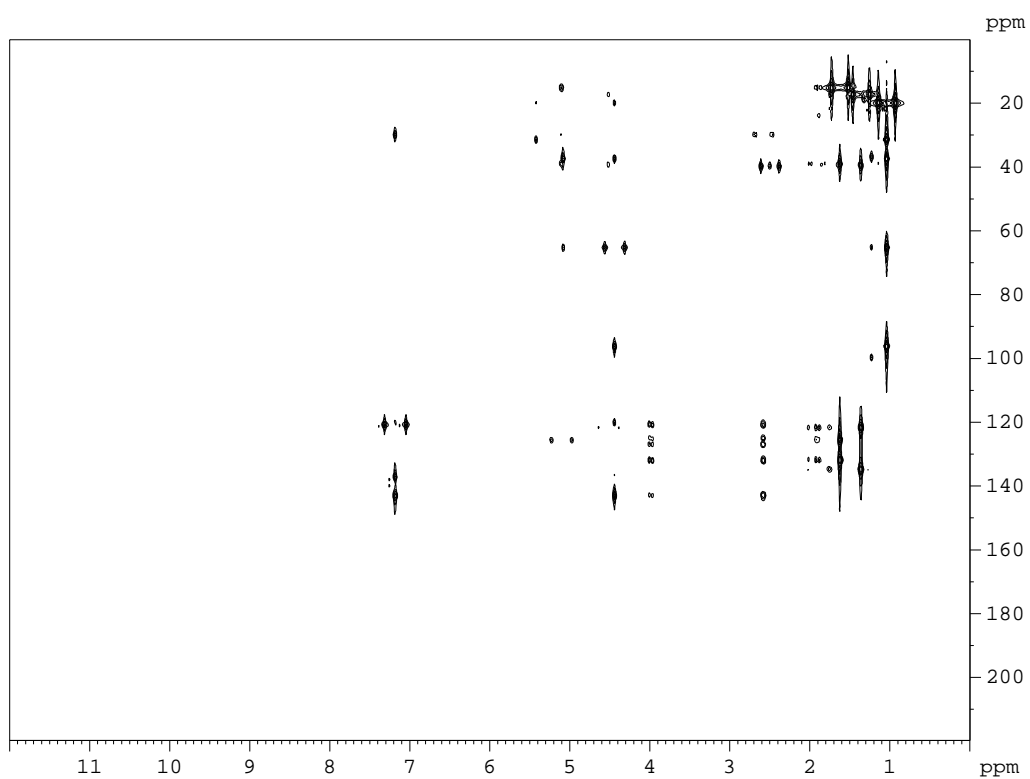

**Figure S19:** 2D  $^1\text{H}$ ,  $^{13}\text{C}$ -HMBC spectrum of siphonodictyal E4 (**4**) in  $\text{DMSO-}d_6$ , 303 K.

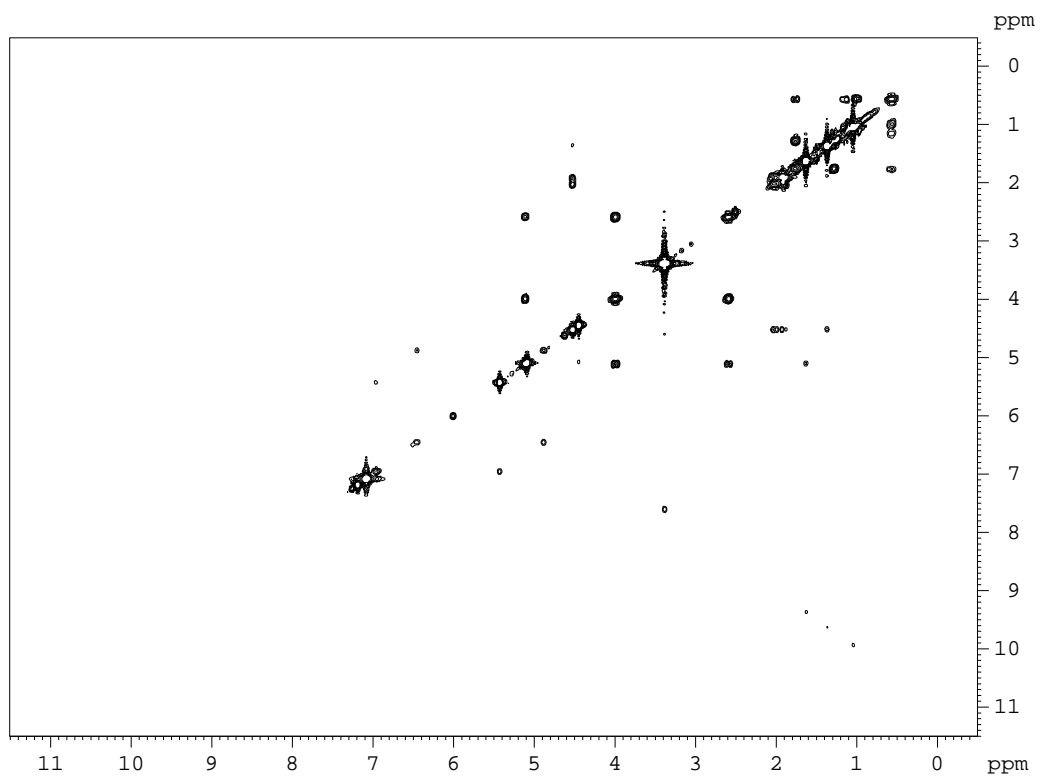

**Figure S20:** 2D  $^1\text{H}$ ,  $^1\text{H}$ -COSY spectrum of siphonodictyal E4 (**4**) in  $\text{DMSO-}d_6$ , 303 K.

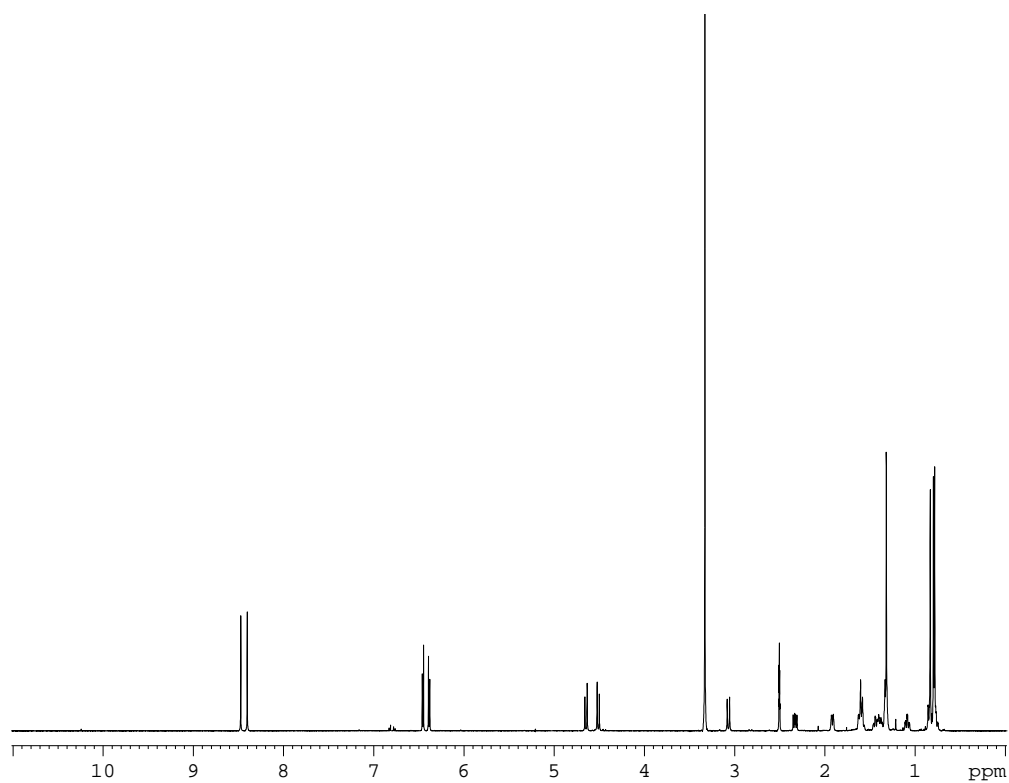

**Figure S21:** 1D <sup>1</sup>H NMR spectrum of cyclosiphonodictyol A (**5**) in DMSO-*d*<sub>6</sub>, 303 K, 600 MHz.

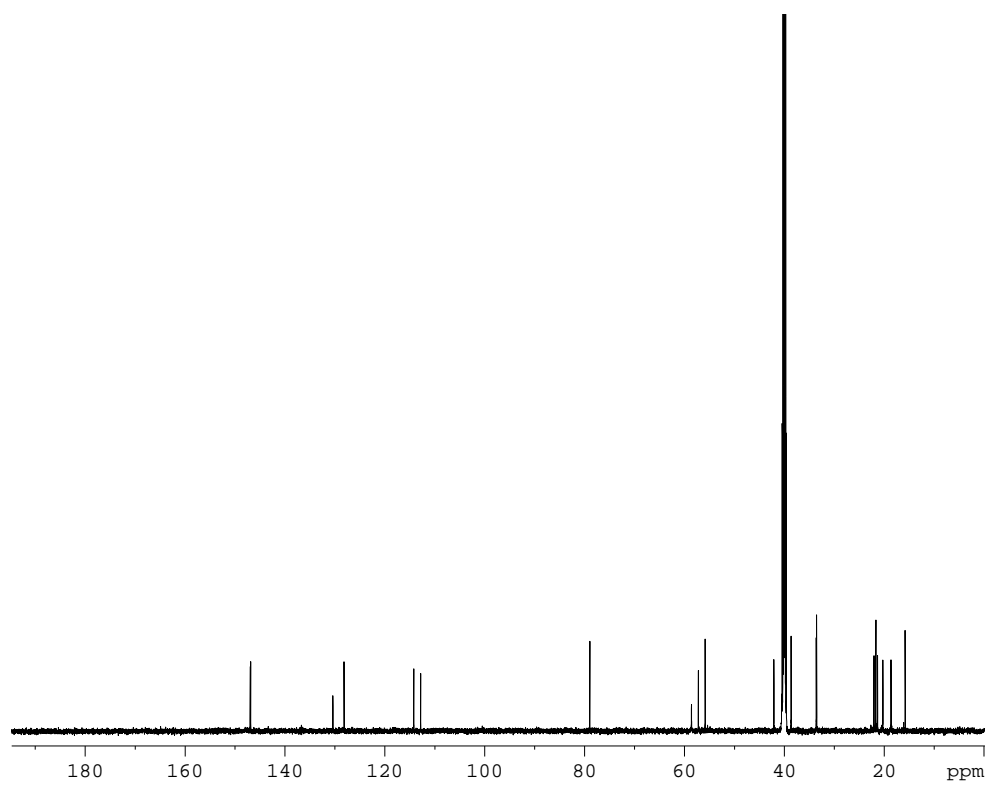

**Figure S22:** 1D <sup>13</sup>C NMR spectrum of cyclosiphonodictyol A (**5**) in DMSO-*d*<sub>6</sub>, 303 K, 150 MHz.

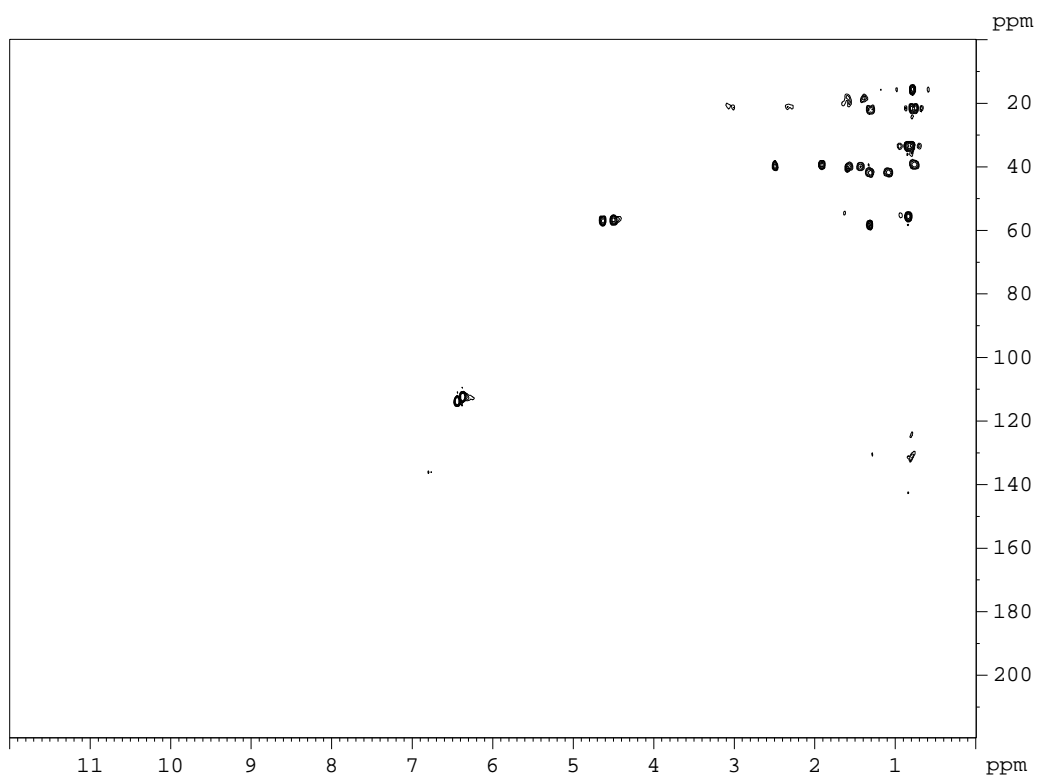

**Figure S23:** 2D  $^1\text{H}$ ,  $^{13}\text{C}$ -HSQC spectrum of cyclosiphonodictyol A (**5**) in  $\text{DMSO-}d_6$ , 303 K.

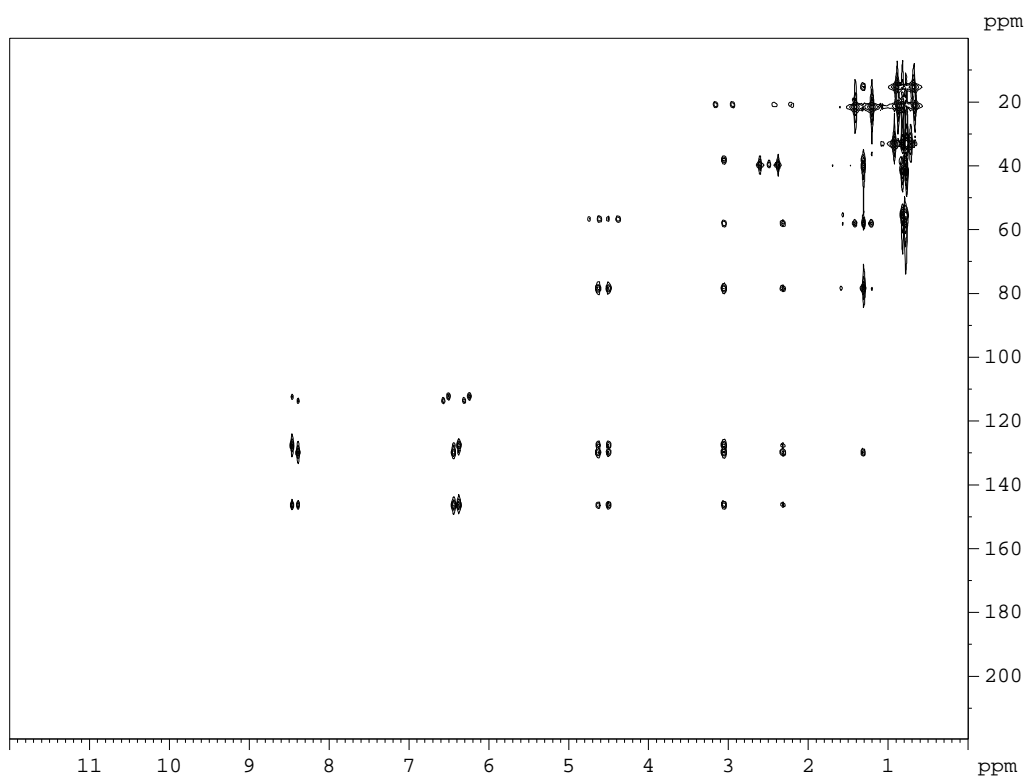

**Figure S24:** 2D  $^1\text{H}$ ,  $^{13}\text{C}$ -HMBC spectrum of cyclosiphonodictyol A (**5**) in  $\text{DMSO-}d_6$ , 303 K.

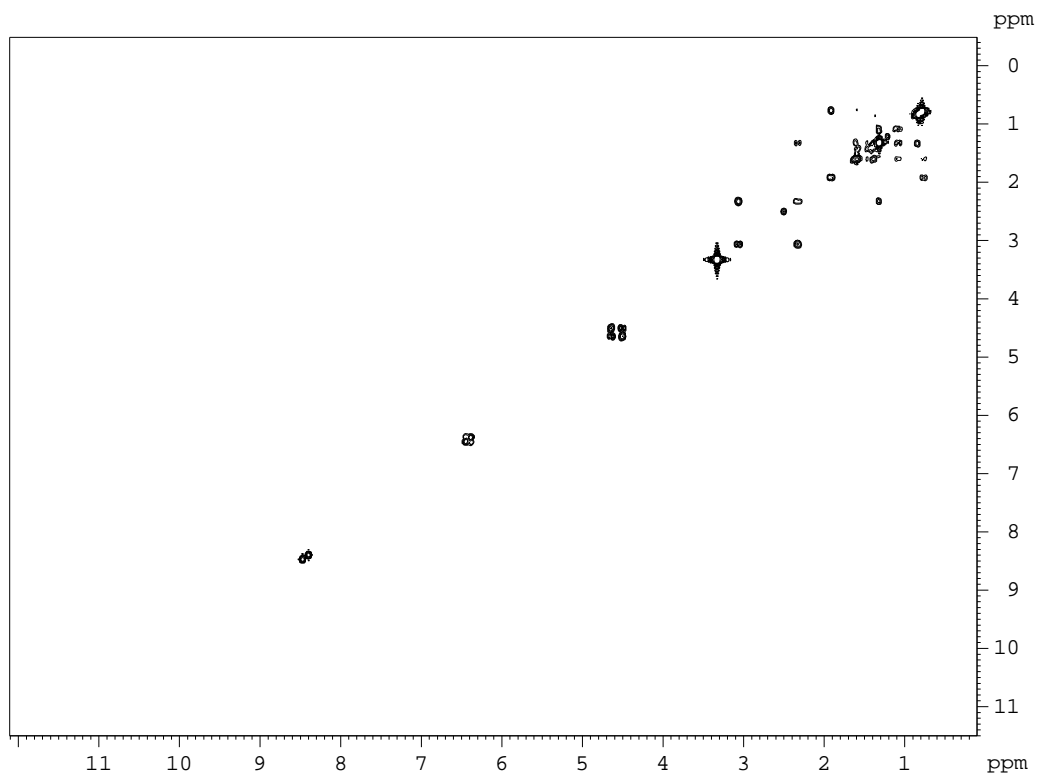

**Figure S25:** 2D  $^1\text{H}$ ,  $^1\text{H}$ -COSY spectrum of cyclophosphodictyol A (**5**) in  $\text{DMSO-}d_6$ , 303 K.
